# Supplementary material for: Transcriptomic and Proteomic Analysis of Gardnerella vaginalis Responding to Acidic pH and Hydrogen Peroxide Stress
Source: MDPI journal article supplement (doi:10.3390/microorganisms11030695), 2023-03-08

Table S1. Primers for QPCR.

| GeneID           | Function                                        |             | Sequence (5'-3')                                           |
|------------------|-------------------------------------------------|-------------|------------------------------------------------------------|
| HMPREF0421_20131 | subunit A of gyrase                             |             | F: TGACACTTTGGTTCGTATGGC<br>R: TCCGTATAACGCATTGCTGC        |
| HMPREF0421_20660 | sensor                                          | histidine   | F: GTGGTACTGGCTTAGGTATGTCT<br>R: ATCACTGCTGGTCCTAGATGC     |
| HMPREF0421_20990 | kinase                                          |             |                                                            |
| HMPREF0421_20990 | sensor                                          | histidine   | F: CGAAATGGCTGAAGAACTAGAGC<br>R: TAGCTTGTAATGCACTAACAGGTG  |
| HMPREF0421_20990 | kinase                                          |             |                                                            |
| HMPREF0421_20118 | thioredoxin-disulfide reductase                 |             | F: GCAAGAATACTCTGGACGAGGT<br>R: CAAAAGCTGAATCGCCTCCG       |
| HMPREF0421_21330 | glutaredoxin                                    |             | F: GCGTCAATTCACCTAAGCTAGGC<br>R: GAGTAATCACCACTGGCGCT      |
| HMPREF0421_21015 | 3-oxoacyl-ACP reductase                         |             | F: ACGCAACAAACCATGCTTTAT<br>R: GCGTATGCTGCTGTTCCCTAG       |
| HMPREF0421_21022 | sensor                                          | histidine   | F: GCCTTATTGTTGCAGCAATAGC<br>R: CCTTTGGATCCCATTGCTGC       |
| HMPREF0421_21022 | kinase                                          |             |                                                            |
| HMPREF0421_21221 | sulfonate                                       | ABC         | F: TATTCGTCATTCGCATGCCG<br>R: GTGAACCTGTGCGTCCGAAT         |
| HMPREF0421_21221 | transporter                                     | permease    |                                                            |
| HMPREF0421_20219 | major                                           | facilitator | F: ACCAGCAAGCACAAAATAGC<br>R: ACTCCTAAGACTATTAACCATGGTGT   |
| HMPREF0421_20219 | superfamily                                     | (MFS)       |                                                            |
| HMPREF0421_20219 | transporter                                     |             |                                                            |
| HMPREF0421_20303 | actinobacterial surface-anchored domain protein |             | F: CGAAAGAACTAAAACCACTAATACTG<br>R: TCCGCGTTCTTTAACAACAGAC |
| HMPREF0421_20991 | transferring                                    | glycosyl    | F: TATTCGTGCTCAACTTATGTAGG<br>R: CCAAATATGAAAAAGGCTTATCG   |
| HMPREF0421_20991 | groups                                          |             |                                                            |
| HMPREF0421_20208 | hydroxyethylthiazole                            |             | F: GCAGAAGAAGCTGAAGTCTTTGC<br>R: CGAATCGCAGCATCCATAGATTC   |
| HMPREF0421_20208 | kinase                                          |             |                                                            |
| HMPREF0421_21089 | type IV                                         | prepilin    | F: TGTGCCTAGACTTTGGGTGT<br>R: TACTGCAAAAAGCCAGCCAC         |
| HMPREF0421_21089 | peptidase                                       |             |                                                            |

Table S2. Unique genes in the Venn analysis.

| Unique genes | GeneID           | Function                                                             |
|--------------|------------------|----------------------------------------------------------------------|
| Control      | HMPREF0421_20665 | integral component of membrane                                       |
|              | HMPREF0421_20284 | hypothetical protein                                                 |
|              | HMPREF0421_20681 | hypothetical protein                                                 |
|              | HMPREF0421_20017 | hypothetical protein                                                 |
|              | HMPREF0421_20419 | hypothetical protein                                                 |
|              | HMPREF0421_21040 | inclusion membrane protein F                                         |
|              | HMPREF0421_21316 | hypothetical protein                                                 |
| Lac          | HMPREF0421_20047 | hypothetical protein                                                 |
|              | HMPREF0421_21359 | type I restriction enzyme, R subunit                                 |
|              | HMPREF0421_20088 | hypothetical protein                                                 |
| LacHyd       | HMPREF0421_20371 | CDP-diacylglycerol-glycerol-3-phosphate<br>3-phosphatidyltransferase |

Table S3. List of the genes with fold changes above two among the differentially expressed genes in *G. vaginalis* cultured under lactate. All *P* values were less than 0.02.

| GeneID           | Log2Fold<br>Change | <i>P</i> value          | <i>P</i> adj            | Function                                              |
|------------------|--------------------|-------------------------|-------------------------|-------------------------------------------------------|
| Upregulated      |                    |                         |                         |                                                       |
| HMPREF0421_21022 | 3.65               | $5.42 \times 10^{-166}$ | $1.51 \times 10^{-164}$ | Sensor histidine kinase                               |
| HMPREF0421_21024 | 3.24               | $1.31 \times 10^{-18}$  | $4.20 \times 10^{-18}$  | ABC transporter                                       |
| HMPREF0421_20927 | 3.15               | 0                       | 0                       | ABC transporter<br>substrate-binding protein          |
| HMPREF0421_20219 | 2.97               | $4.12 \times 10^{-71}$  | $4.02 \times 10^{-70}$  | major facilitator<br>superfamily (MFS)<br>transporter |
| HMPREF0421_21023 | 2.96               | $1.88 \times 10^{-14}$  | $5.23 \times 10^{-14}$  | Hypothetical protein                                  |
| HMPREF0421_21015 | 2.90               | $1.27 \times 10^{-91}$  | $1.64 \times 10^{-90}$  | 3-oxoacyl-ACP reductase                               |
| HMPREF0421_21026 | 2.73               | $5.07 \times 10^{-21}$  | $1.72 \times 10^{-20}$  | ABC transporter<br>ATP-binding protein                |
| HMPREF0421_21025 | 2.70               | $6.04 \times 10^{-33}$  | $2.94 \times 10^{-32}$  | ABC transporter<br>ATP-binding protein                |
| HMPREF0421_20844 | 2.59               | 0                       | 0                       | Cobalt ABC transporter                                |
| HMPREF0421_20843 | 2.36               | $5.32 \times 10^{-206}$ | $2.16 \times 10^{-204}$ | Membrane protein                                      |
| HMPREF0421_20839 | 2.20               | 0                       | 0                       | NADH dehydrogenase                                    |
| HMPREF0421_20940 | 2.17               | 0                       | 0                       | oligoribonuclease                                     |
| HMPREF0421_21014 | 2.05               | $1.04 \times 10^{-120}$ | $2.04 \times 10^{-119}$ | 2-keto-3-deoxygluconate<br>permease                   |
| Downregulated    |                    |                         |                         |                                                       |
| HMPREF0421_20991 | -3.24              | $7.95 \times 10^{-28}$  | $3.39 \times 10^{-27}$  | Transferring glycosyl<br>groups                       |
| HMPREF0421_21002 | -2.86              | $9.73 \times 10^{-82}$  | $1.06 \times 10^{-80}$  | Cell division protein FtsK                            |
| HMPREF0421_20208 | -2.75              | 0                       | 0                       | Hydroxyethylthiazole<br>kinase                        |
| HMPREF0421_21089 | -2.51              | $4.12 \times 10^{-12}$  | $1.06 \times 10^{-11}$  | Type IV prepilin peptidase                            |
| Novel C3         | -2.46              | $9.40 \times 10^{-20}$  | $3.08 \times 10^{-19}$  | Transcription regulator                               |
| HMPREF0421_20331 | -2.24              | $5.36 \times 10^{-58}$  | $4.22 \times 10^{-57}$  | Serine/threonine protein<br>kinase                    |
| HMPREF0421_20303 | -2.21              | $8.22 \times 10^{-223}$ | $4.08 \times 10^{-221}$ | Actinobacterial<br>surface-anchored domain<br>protein |
| HMPREF0421_20304 | -2.04              | $1.31 \times 10^{-77}$  | $1.38 \times 10^{-76}$  | Hypothetical protein                                  |

Table S4. List of the differentially expressed genes in the Lac group compared to the LacHyd group. All *P* values were less than 0.02.

| Gene ID          | Fold change | <i>P</i> value          | <i>P</i> adj            | Function                                    |
|------------------|-------------|-------------------------|-------------------------|---------------------------------------------|
| HMPREF0421_20956 | 1.42        | $7.96 \times 10^{-156}$ | $3.55 \times 10^{-153}$ | Trimeric autotransporter adhesin            |
| HMPREF0421_20499 | -1.37       | $8.86 \times 10^{-11}$  | $7.95 \times 10^{-10}$  | LPXTG-motif cell wall anchor domain protein |
| HMPREF0421_20990 | -1.17       | $1.35 \times 10^{-33}$  | $5.84 \times 10^{-32}$  | Sensor histidine kinase                     |
| HMPREF0421_20489 | -1.26       | $7.72 \times 10^{-200}$ | $1.03 \times 10^{-196}$ | ABC transporter ATP-binding protein         |
| HMPREF0421_20488 | -1.09       | $1.28 \times 10^{-177}$ | $8.58 \times 10^{-175}$ | ABC transporter substrate-binding protein   |

Figure S1. The expressional level of response markers after adding lactate and H<sub>2</sub>O<sub>2</sub>. Bars represent the mean and the error bars the standard error of the mean (mean  $\pm$  SEM).

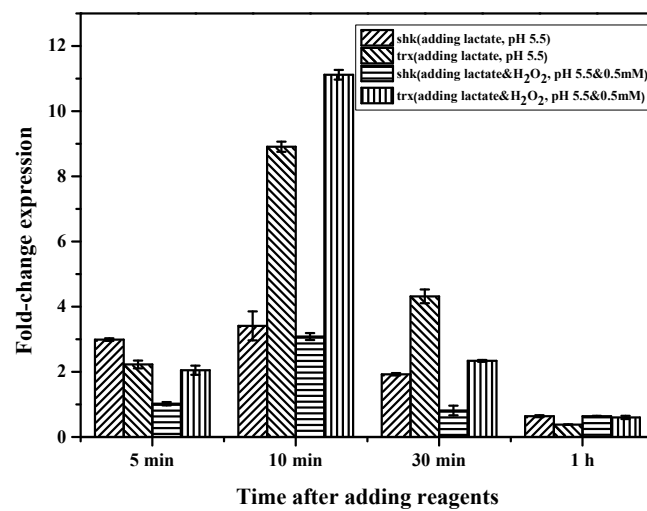

Supplement: s1 [file s1]
